# Supplementary material for: Mode of arrival to the emergency department - a national, cross-sectional study in Sweden
Source: Research Square preprint supplement (doi:10.21203/rs.3.rs-620581/v1), 2021-06-21
Supplement: Supplementary file 3 [file 02fddca5e20c9ef1c7ef92f0.docx]

Deltagande klinik/akutmottagningen i:

| Plats för etikett  Med patientdata |
| --- |

*Hur ankom patienten till akuten?* ***Kryssa endast ett alternativ!***

| **Ankommer med ambulans** |  |
| --- | --- |

**Eller**

| **Eget initiativ utan föregående vårdkontakt** | |  |
| --- | --- | --- |
| **Hänvisad av 1177** | |  |
| **Från vårdcentral** | Med remiss |  |
| Hänvisad utan remiss |  |
| **Från klinik på sjukhuset** | Med remiss |  |
| Hänvisad utan remiss |  |
| **Från vårdgivare på internet** | Med remiss |  |
| Hänvisad utan remiss |  |
| **Hänvisad vid sjukvårdskontakt (t.ex. sjukgymnast)** | |  |
| **Återbesök på akutmottagning** | |  |

Participating Clinic/Emergency Department

| Patient data sticker |
| --- |

*How did the patient arrive to the emergency?* **Check only one alternative!**

| **Arrival by ambulance** |  |
| --- | --- |

**Or**

| **Self-referred walk-in without prior healthcare contact** | |  |
| --- | --- | --- |
| **Referred by Healthcare guide 1177** | |  |
| **From primary care** | By referral |  |
| Without referral |  |
| **From in-hospital doctor** | By referral |  |
| Without referral |  |
| **Internet medical service** | By referral |  |
| Without referral |  |
| **Referred by other healthcare provider** | |  |
| **Return visit** | |  |
